# Supplementary material for: A community intervention effectiveness study of single dose or two doses of bivalent HPV vaccine (CERVARIX®) in female school students in Thailand
Source: PLoS One. 2022 Apr 28;17(4):e0267294. doi: 10.1371/journal.pone.0267294 (PMC9049519; doi:10.1371/journal.pone.0267294)
Supplement: S2 File — (PDF) [file pone.0267294.s003.pdf]

# Inclusivity in global research

PLOS' policy on inclusivity in global research aims to improve transparency in the reporting of research performed outside of researchers' own country or community and ensures that PLOS publications reporting global research adhere to high standards for research ethics and authorship. Authors of relevant research articles may be asked to complete the questionnaire below, which outlines ethical, cultural, and scientific considerations specific to inclusivity in global research. This questionnaire may be requested when researchers have travelled to a different country to conduct research, if research uses samples collected in another country, research with Indigenous populations or their lands, or if research is on cultural artefacts. Researchers travelling to another country solely to use laboratory equipment will not normally be required to complete the questionnaire. However, the questionnaire can be requested at the journal's discretion for any submission – if you have been requested to complete this questionnaire by the PLOS journal you submitted to, please do so.

Please complete the questionnaire below and include this as a Supporting Information file with your manuscript. Note that if your paper is accepted for publication, this checklist will be published with your article in the supporting information files. Please ensure that you reference the checklist in the main body of your manuscript. We suggest adding a subsection 'Inclusivity in global research' to your Methods section and adding the following sentence: "Additional information regarding the ethical, cultural, and scientific considerations specific to inclusivity in global research is included in the Supporting Information (SX Checklist)"

The questions have been designed to be applicable to a wide range of study types, and there are subsections for both human subjects research and non-human subjects research. If any of the questions are not relevant to your research please mark them as "N/A" as appropriate.

## Ethical considerations, permits and authorship

*This section is applicable to all research types.*

Provide details as to who granted permissions and/or consent for the study to take place in the Methods section of your manuscript. This should include the names of **all** ethics boards, governmental organizations, community leaders or other bodies that provided approval for the study. If individuals provided approval refer to these people by their role or title but do not list their name(s).

Reported on page number: 4

The protocol was first approved by the IVI IRB (IVI HPV1 2018-005 V1.3) on 20 Nov 2018, the Thailand Ministry of Health EC (Ref.no.25/2561, V1.0) on 29 Nov 2018, and the Chulalongkorn University IRB (IRB No. 495/61 V1.0) on 4 Dec 2018. The US CDC IRB deferred to the IVI IRB 7 May 2019. This paper is based on the protocol version Version 6.0 dated 15 Dec 2021 (IVI IRB approval 15 Dec 2021, Ministry of Health EC 12 Jan 2022, Chulalongkorn University V 5.0 8 Sep 2020-V 6.0 under review). Written informed consent and/or assent is obtained from all guardians and subjects.

If there were any deviations from the study protocol after approval was obtained please provide details of these changes in the Methods section of your manuscript.

Reported on page number: There have been no significant deviations from the original protocol; the newer versions contain updates to reconcile Thai and English versions and to update administrative information.

Did this study involve local collaborators that are residents of the country where the research was conducted or members of the community studied? If you do not have any authors from said communities, please provide an explanation for this below.

There are numerous collaborators and co-authors from Thailand.

Everyone listed as an author should meet PLOS' criteria for authorship and all individuals who meet these criteria should be included in the author byline, rather than the acknowledgements. Authorship criteria is based on the International Committee of Medical Journal Editors (ICMJE) Uniform Requirements for Manuscripts Submitted to Biomedical Journals - for further information please see here: <https://journals.plos.org/plosone/s/authorship>.

## Human subjects research (e.g. health research, medical research, cross-cultural psychology)

Did you obtain written informed consent from a representative of the local community or region before the research took place? How did you establish who speaks for the community? Details of written informed consent obtained from study participants should be reported separately in the Methods section of your manuscript.

The research plan, developed with Thai collaborators in the Ministry of Health and Chulalongkorn University, was discussed during a one day meeting with national level stakeholders that included leaders of professional societies in Thailand representing Pediatrics, Obstetrics/Gynecology, Oncology and Public Health prior to the finalization of the research plan. The research plan was also presented to Province level public health and education leaders for their input and approval. Every school was allowed an opportunity to join the study. When school leaders agreed to allow participation of their school, information is shared with school staff, parents and students. Individual consent from guardians and assent from students is obtained for vaccination and participation in the serology study. In order to protect student privacy, only student assent is obtained for participation in surveys.

How did members of the local community provide input on the aims of the research investigation, its methodology, and its anticipated outcome(s)?

The research plan was discussed during a one day meeting with national level stakeholders that included leaders of professional societies in Thailand representing Pediatrics, Obstetrics/Gynecology, Oncology and Public Health prior to the finalization of the research plan. Input on the aims, methodology and potential impact of the study was solicited from national stakeholders.

Province level public health and education leaders provided important insight on how to share information about the study with the school community, and gave guidance on operational strategies to ensure success but minimize disruption of educational activities.

When engaging with the local community, how did you ensure that the informed consent documents and other materials could be understood by local stakeholders?

The informed consent/assent documents were drafted in Thai by Thai speaking staff and reviewed and approved by two Thai Ethical Committees.

Will the findings of the research be made available in an understandable format to stakeholders in the community where the study was conducted (e.g. via a presentation, summary report, copies of publications, etc.)? Please provide details of how this will be achieved.

Prior to publication, the findings of the research will be shared with national level stakeholders that include leaders of professional societies in Thailand and members of the National Immunization Technical Advisory Group (NITAG) as they are expected to have an impact on vaccine policy. As the findings in Thailand may be generally relevant to low and middle-income countries, the results will be shared with the SAGE HPV Working Group for consideration of WHO policy statements. The Thai Ministry of Health is responsible for communication of study results within Thai Government agencies, including the Provincial level authorities, and to the Thai public using their approved forums for communication. The results of the study will be published in an open access journal.

**Non-human subjects research using specimens/ animals collected as part of the study, or those housed in archival collections. Examples include archaeology, paleontology, botany and zoology.**

Did the permission you obtained from a local authority to perform the study include an agreement on access to outputs and benefit sharing? This may include procedures to enable fair distribution of the benefits and resources arising from the research performed. Please include any details of Prior Informed Consent and

N/A

Benefit Sharing Agreements obtained. These may be required by field-specific regulations, for example the Convention on Biological Diversity (CBD) and the associated Nagoya Protocol.

If the material used in your study was imported, please A) provide the year it was imported and B) indicate whether permits were obtained to import/export the materials used, C) provide details of any permits obtained. If this information is not available, please indicate this.

N/A

If you used archival specimens, please state how the material used in your study was acquired by the institute it is held in and provide details of any permits obtained for the original excavations/ sample collection. If this information is not available, please indicate this.

N/A

How was the potential cultural significance of the materials collected in your study to local communities considered in your research design? Were Indigenous peoples and/or local researchers and institutions involved with archaeological excavations / collection of specimens? If so, please provide a description of their involvement.

N/A

If your manuscript includes photographs of human remains please indicate whether authors obtained permission from descendants or affiliated cultural communities to do so.

N/A
